# Supplementary material
Source: ML conference proceedings conference paper supplement (https://openreview.net/forum?id=vTLLyVCsrD)

# Half-cheetah, goal direction

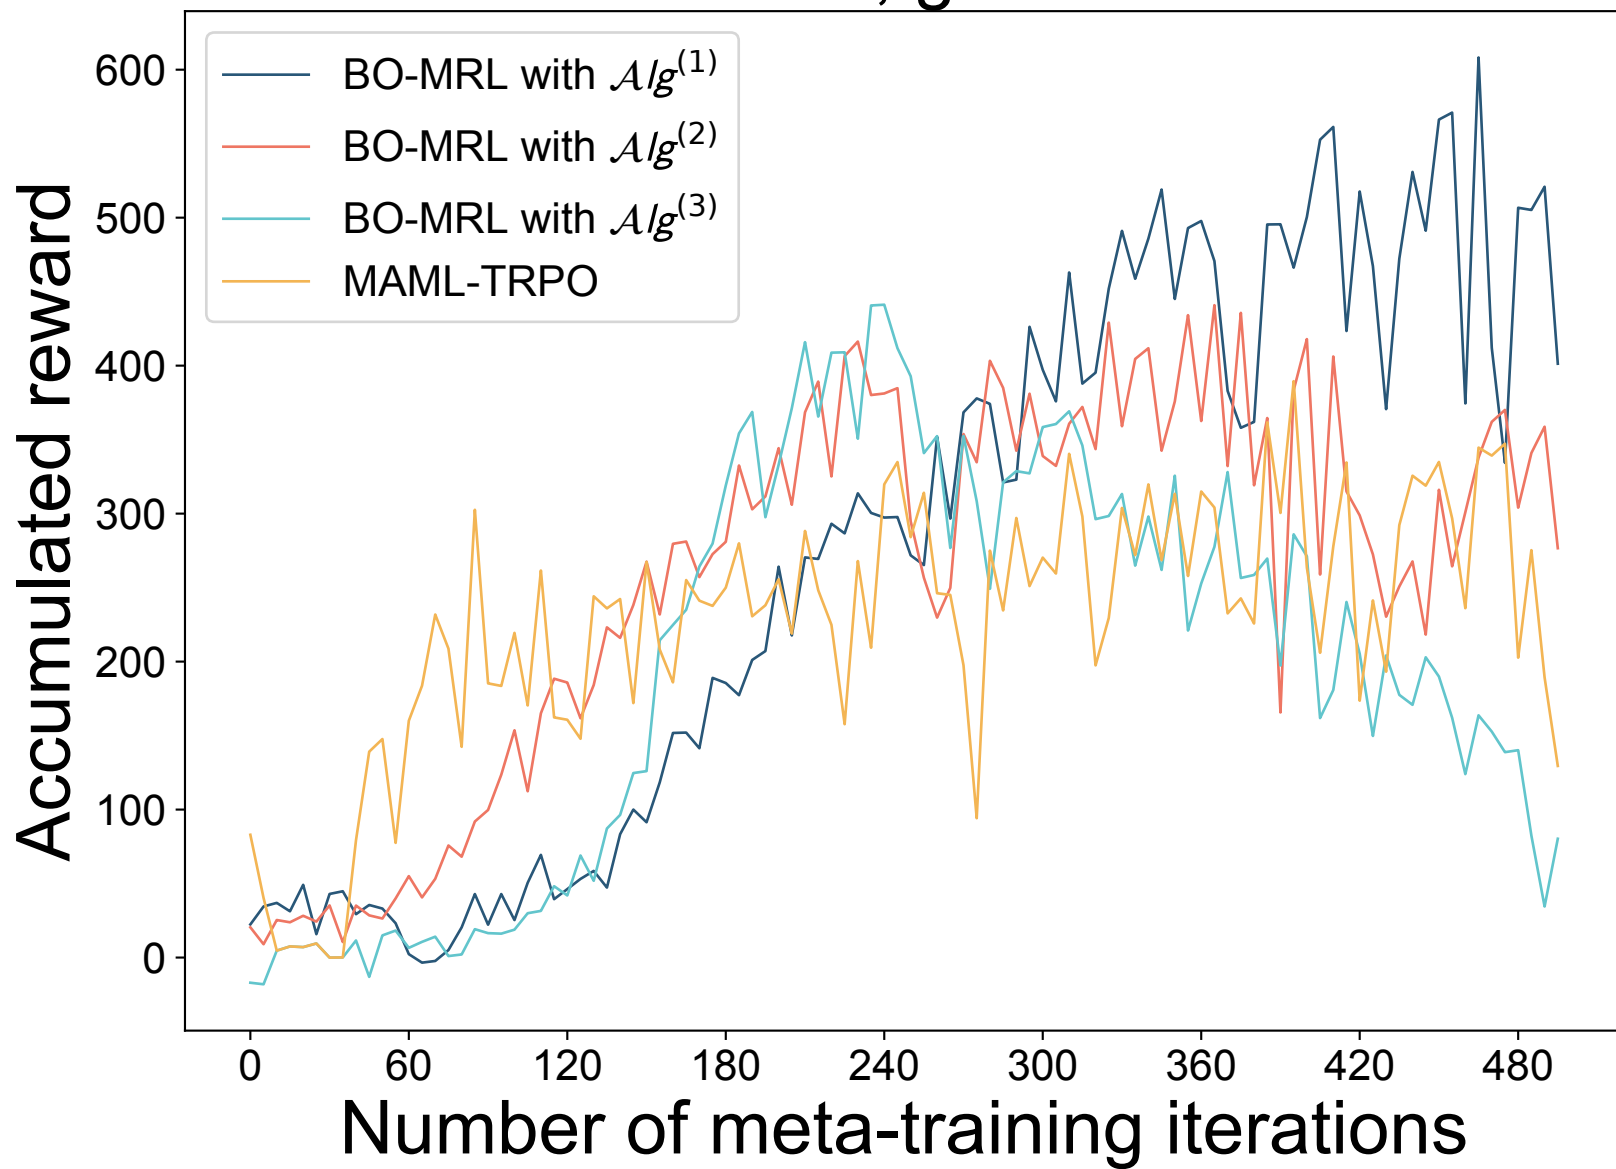

Supplement: supplementary_material [file attachment]

# Half-cheetah, goal velocity

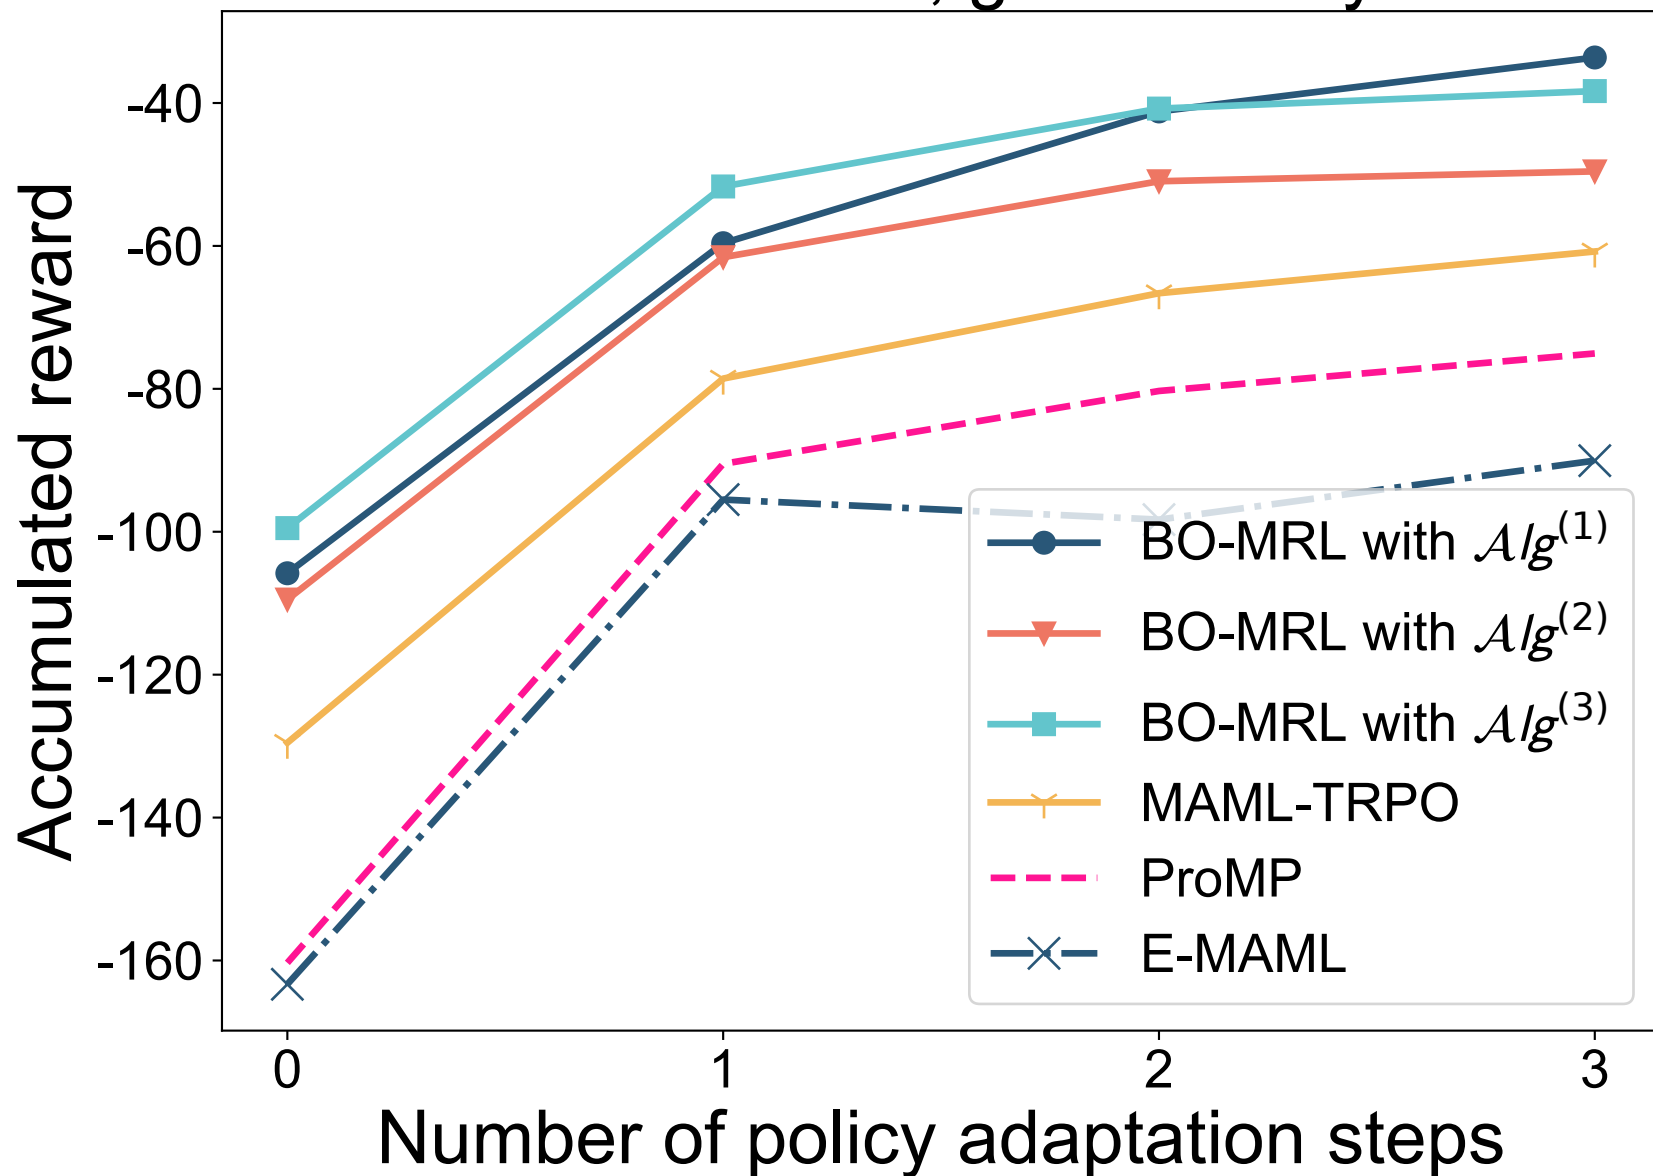

Supplement: supplementary_material [file attachment]

# Half-cheetah, goal velocity

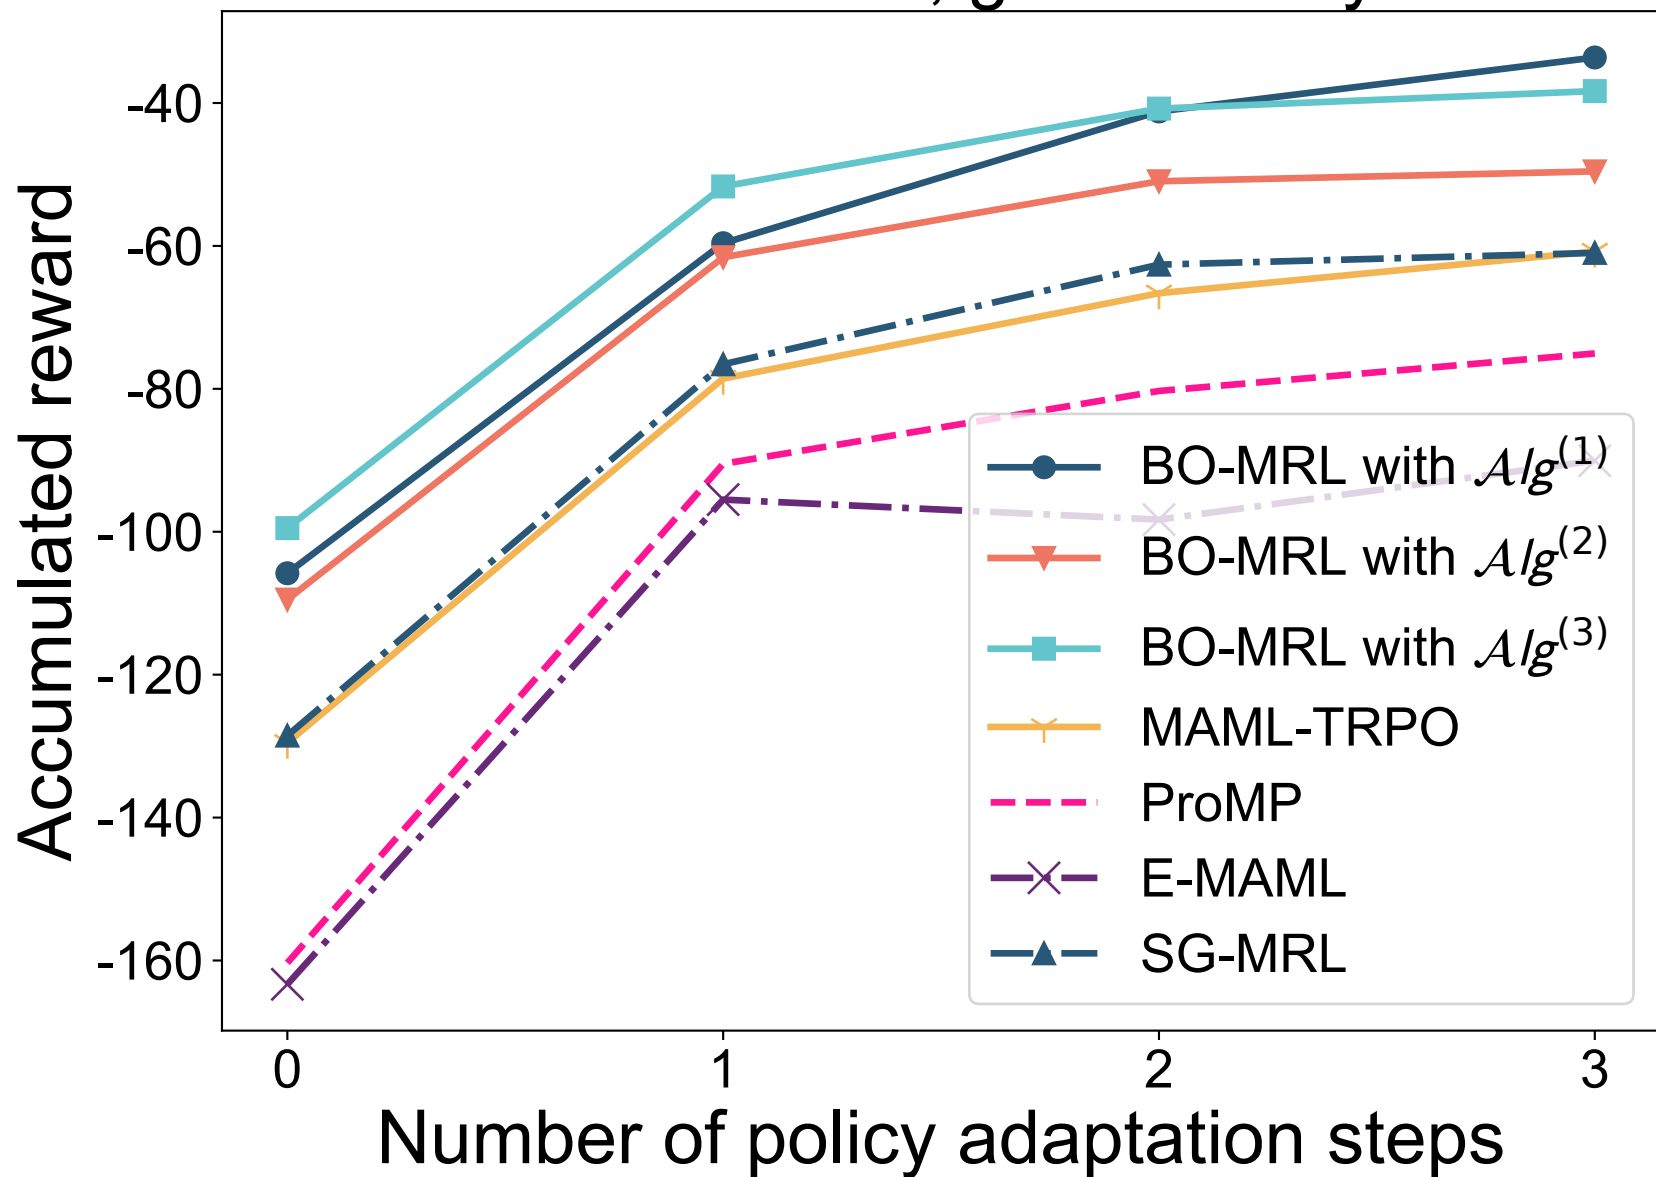

Supplement: supplementary_material [file attachment]

# Ant, goal direction

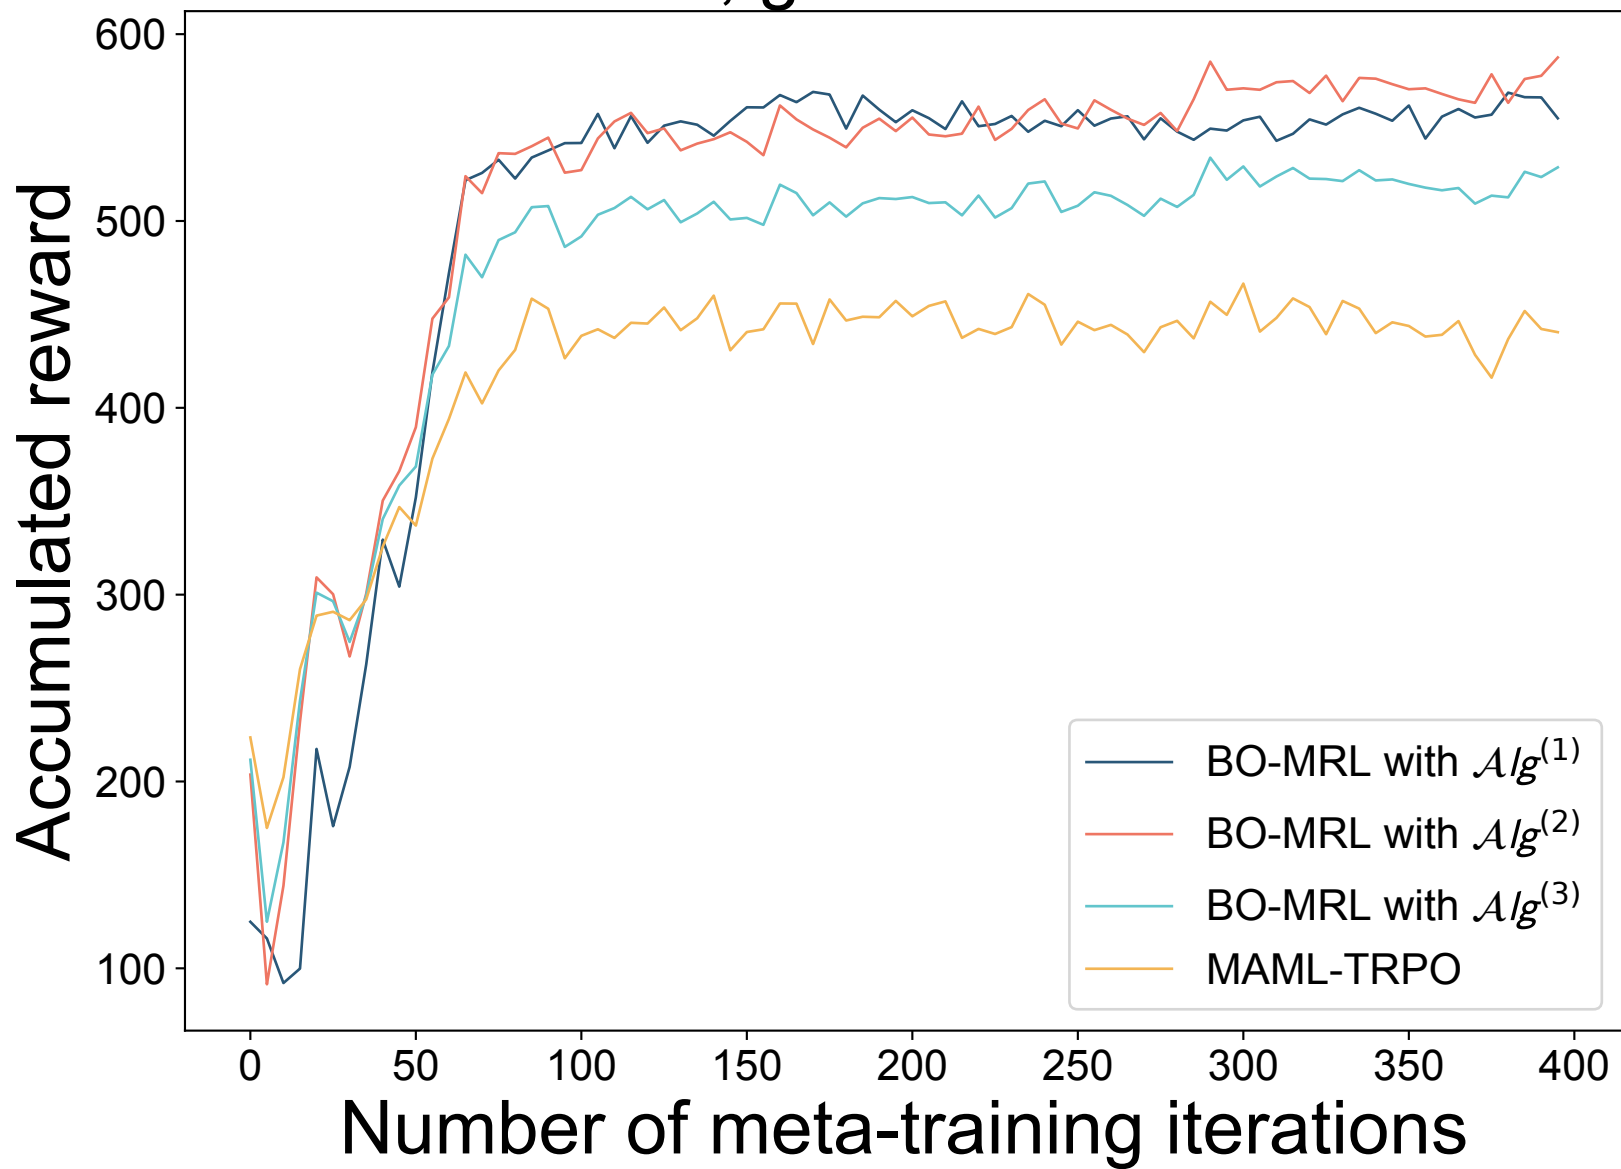

Supplement: supplementary_material [file attachment]

# Half-cheetah, moving direction

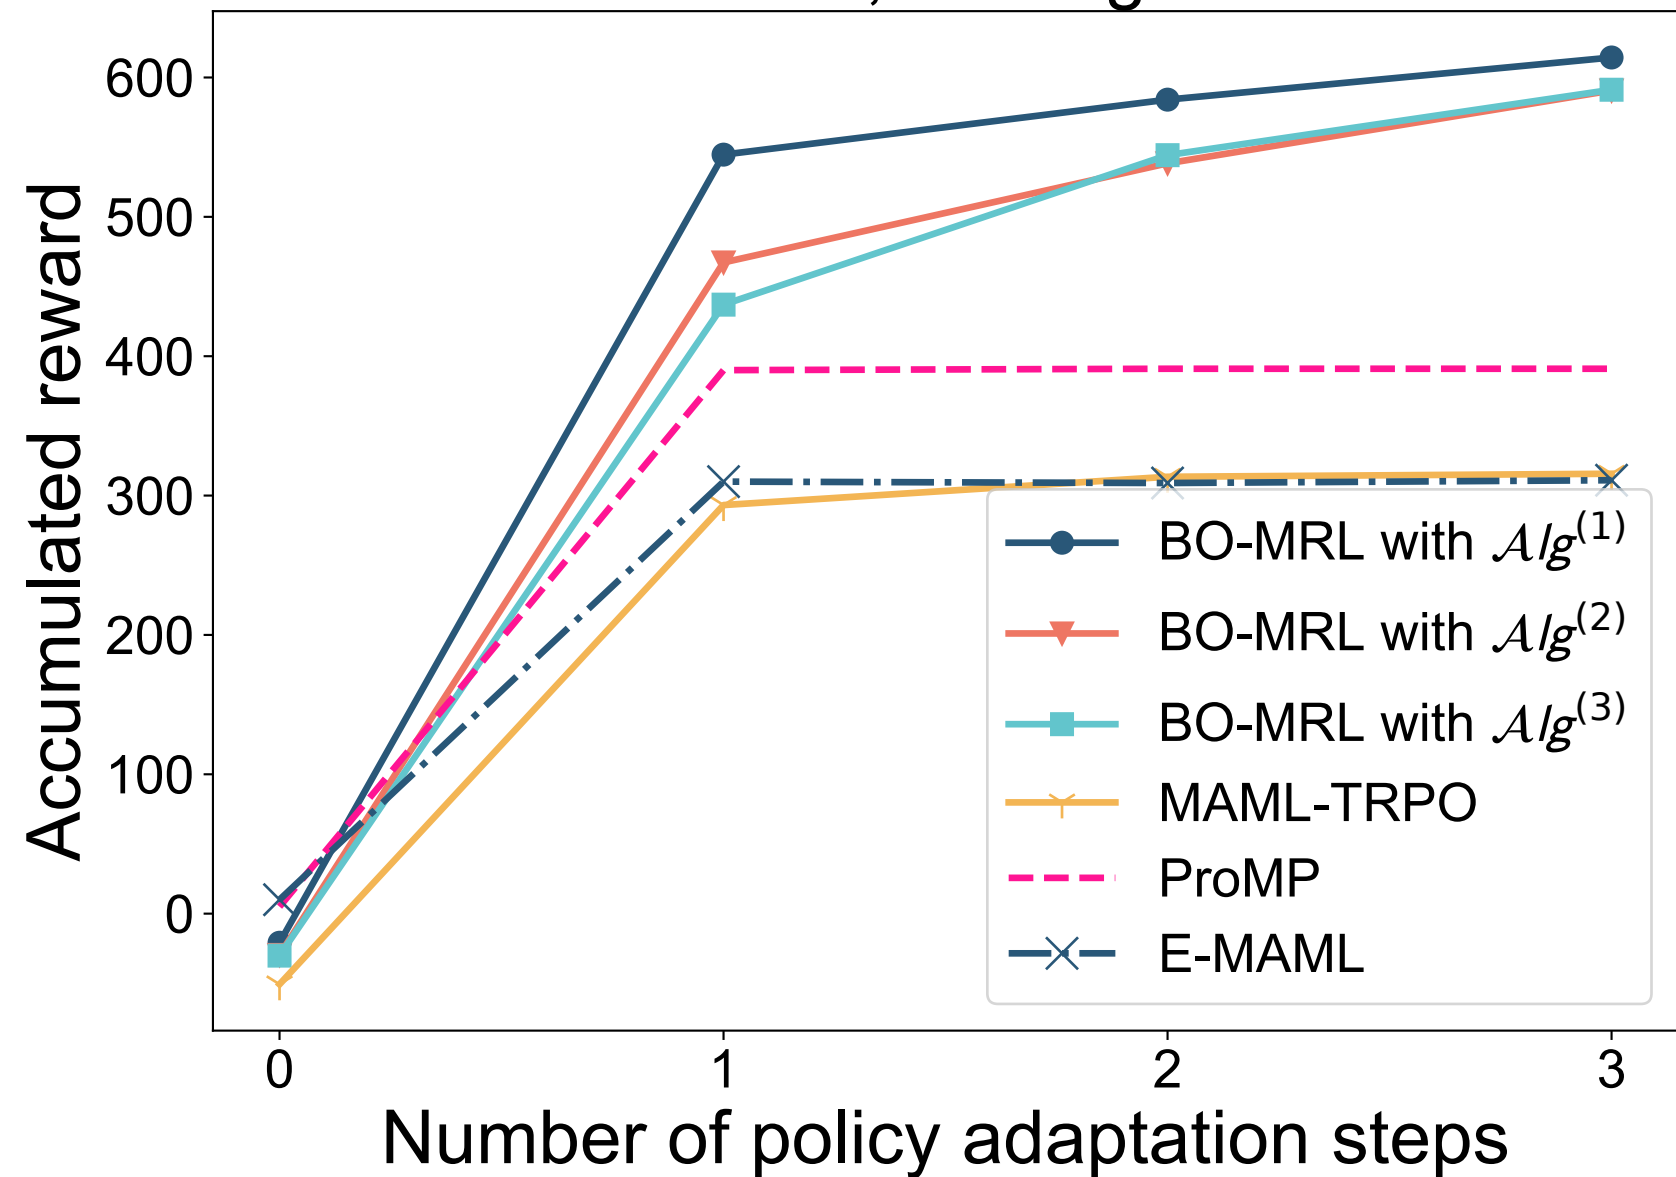

Supplement: supplementary_material [file attachment]

# Ant, goal velocity

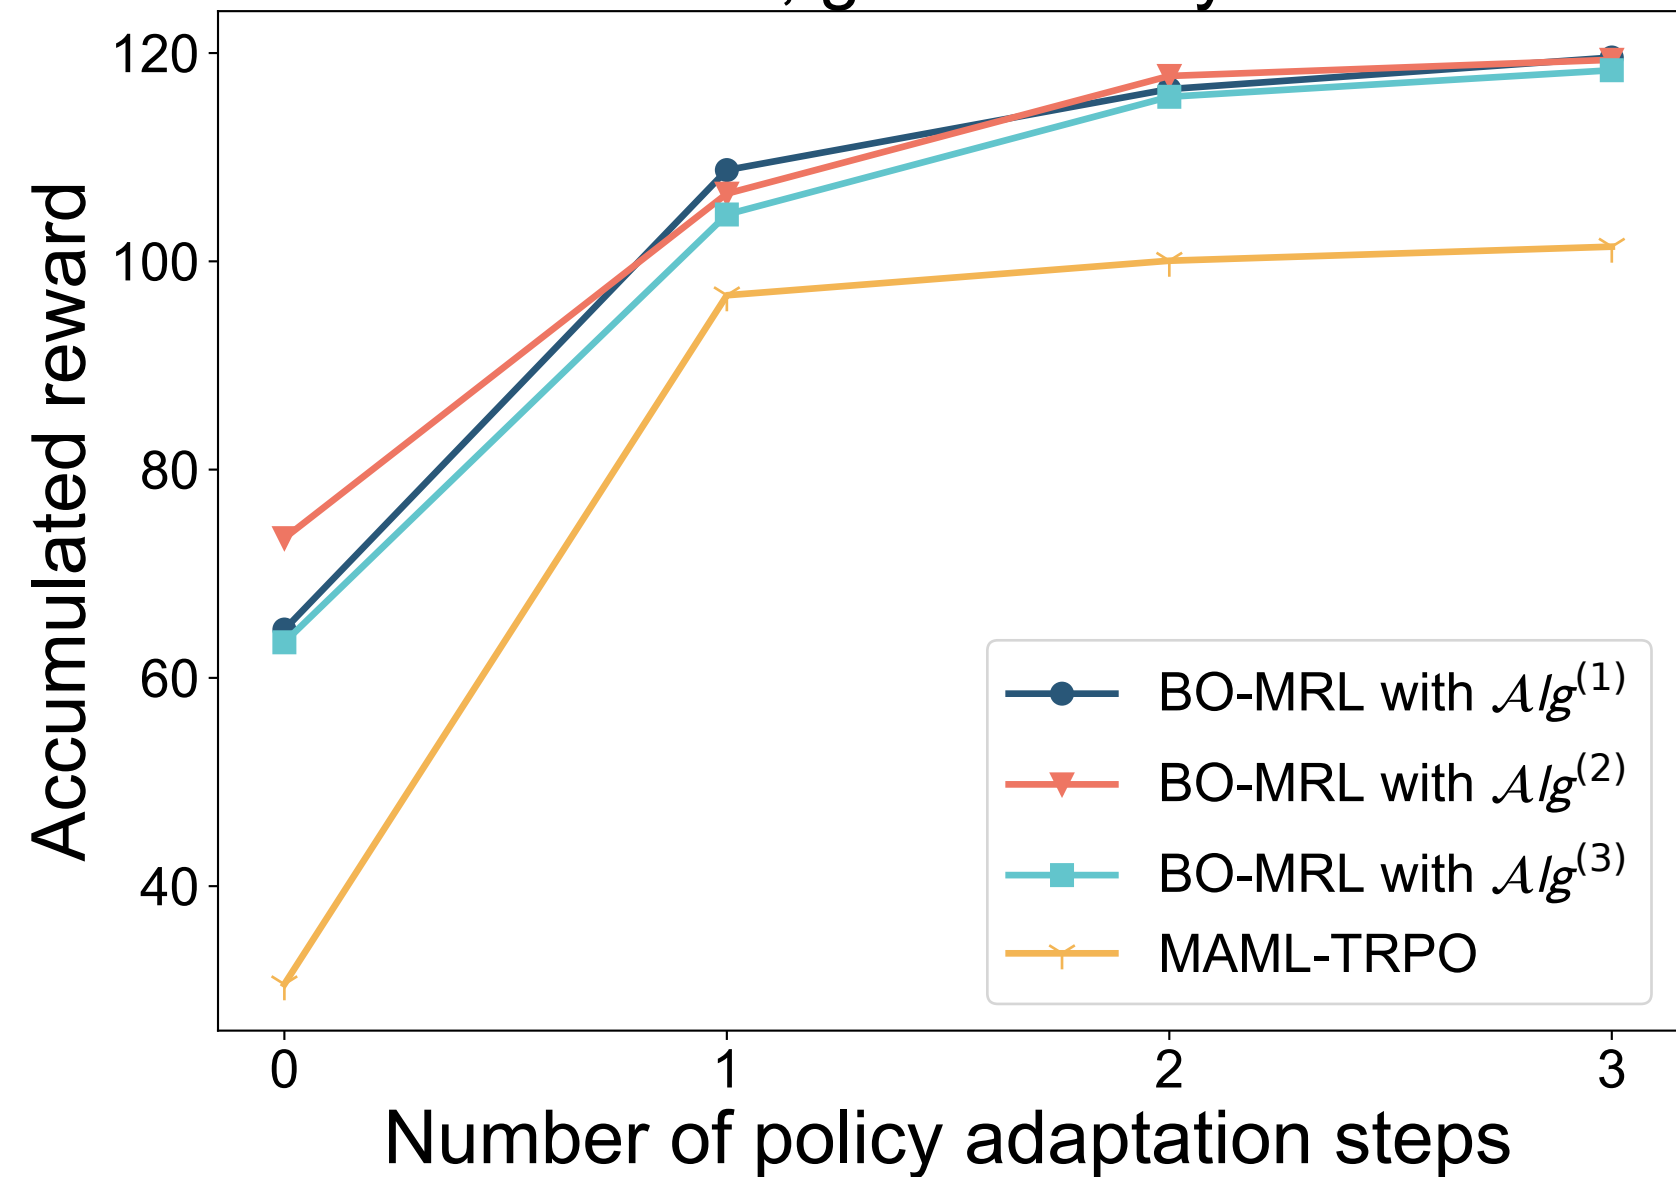

Supplement: supplementary_material [file attachment]

# Ant, goal velocity

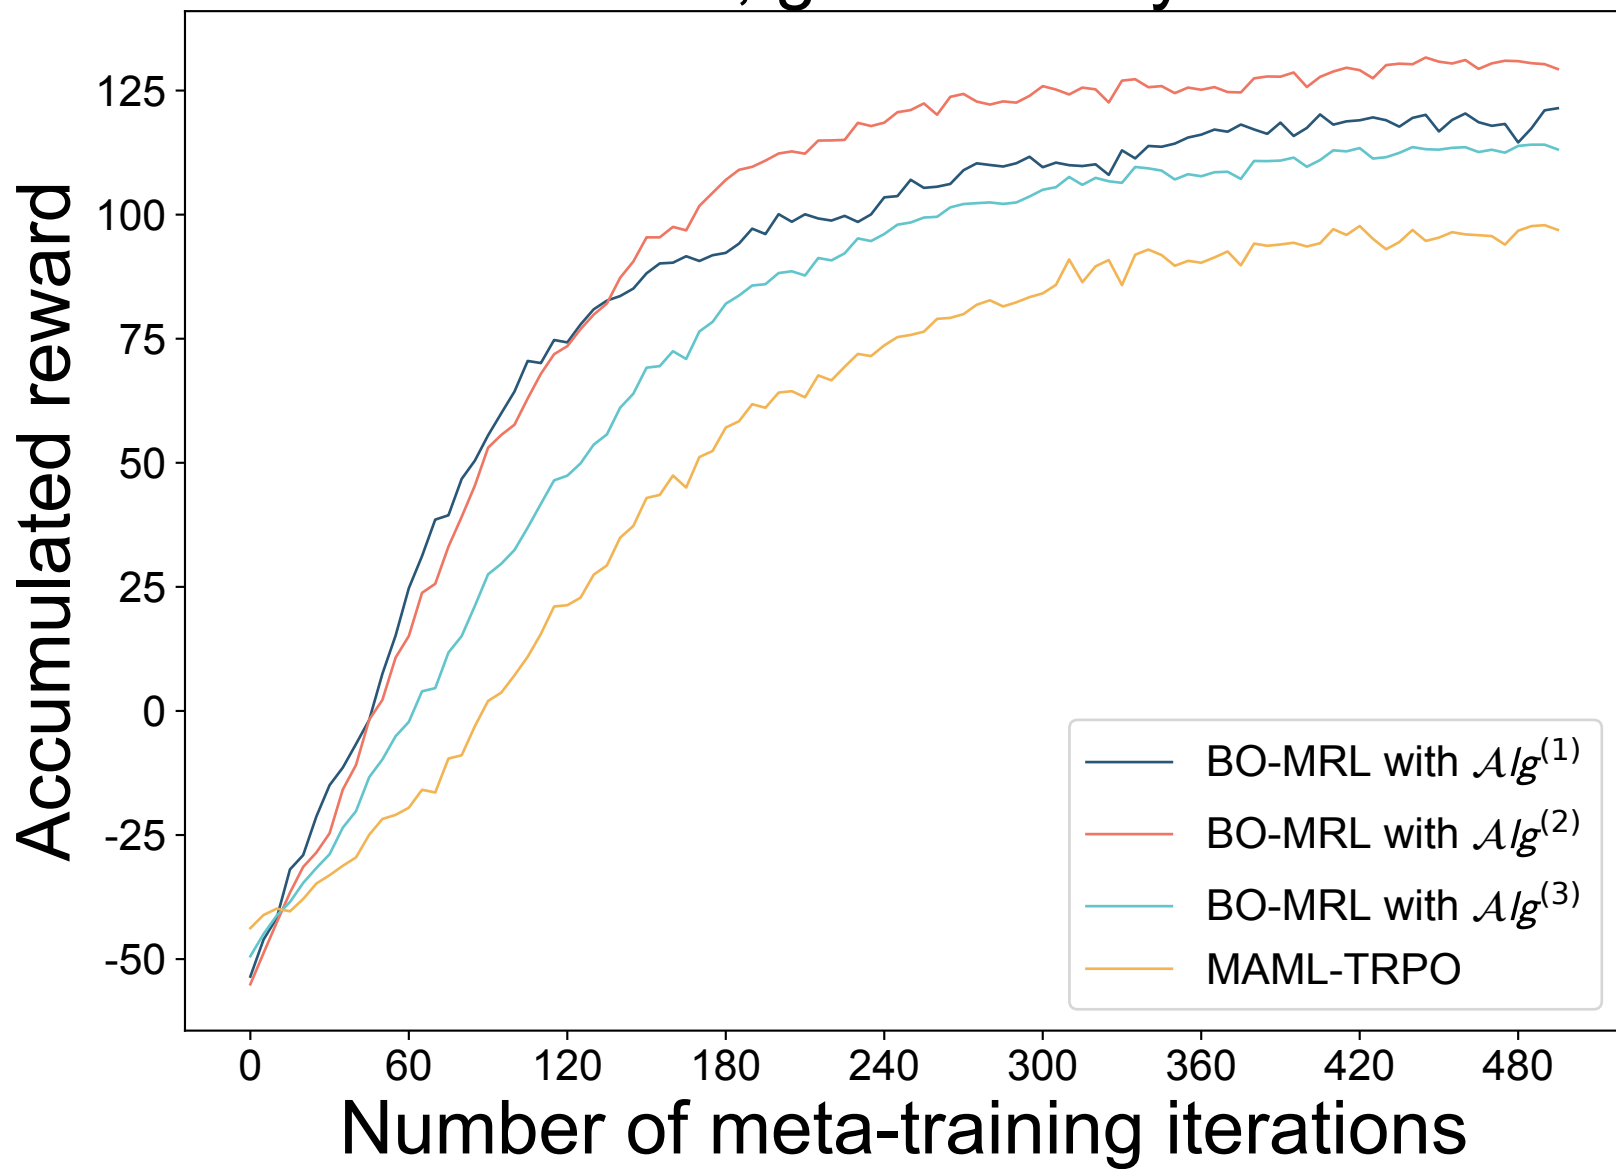

Supplement: supplementary_material [file attachment]

# Ant, moving direction

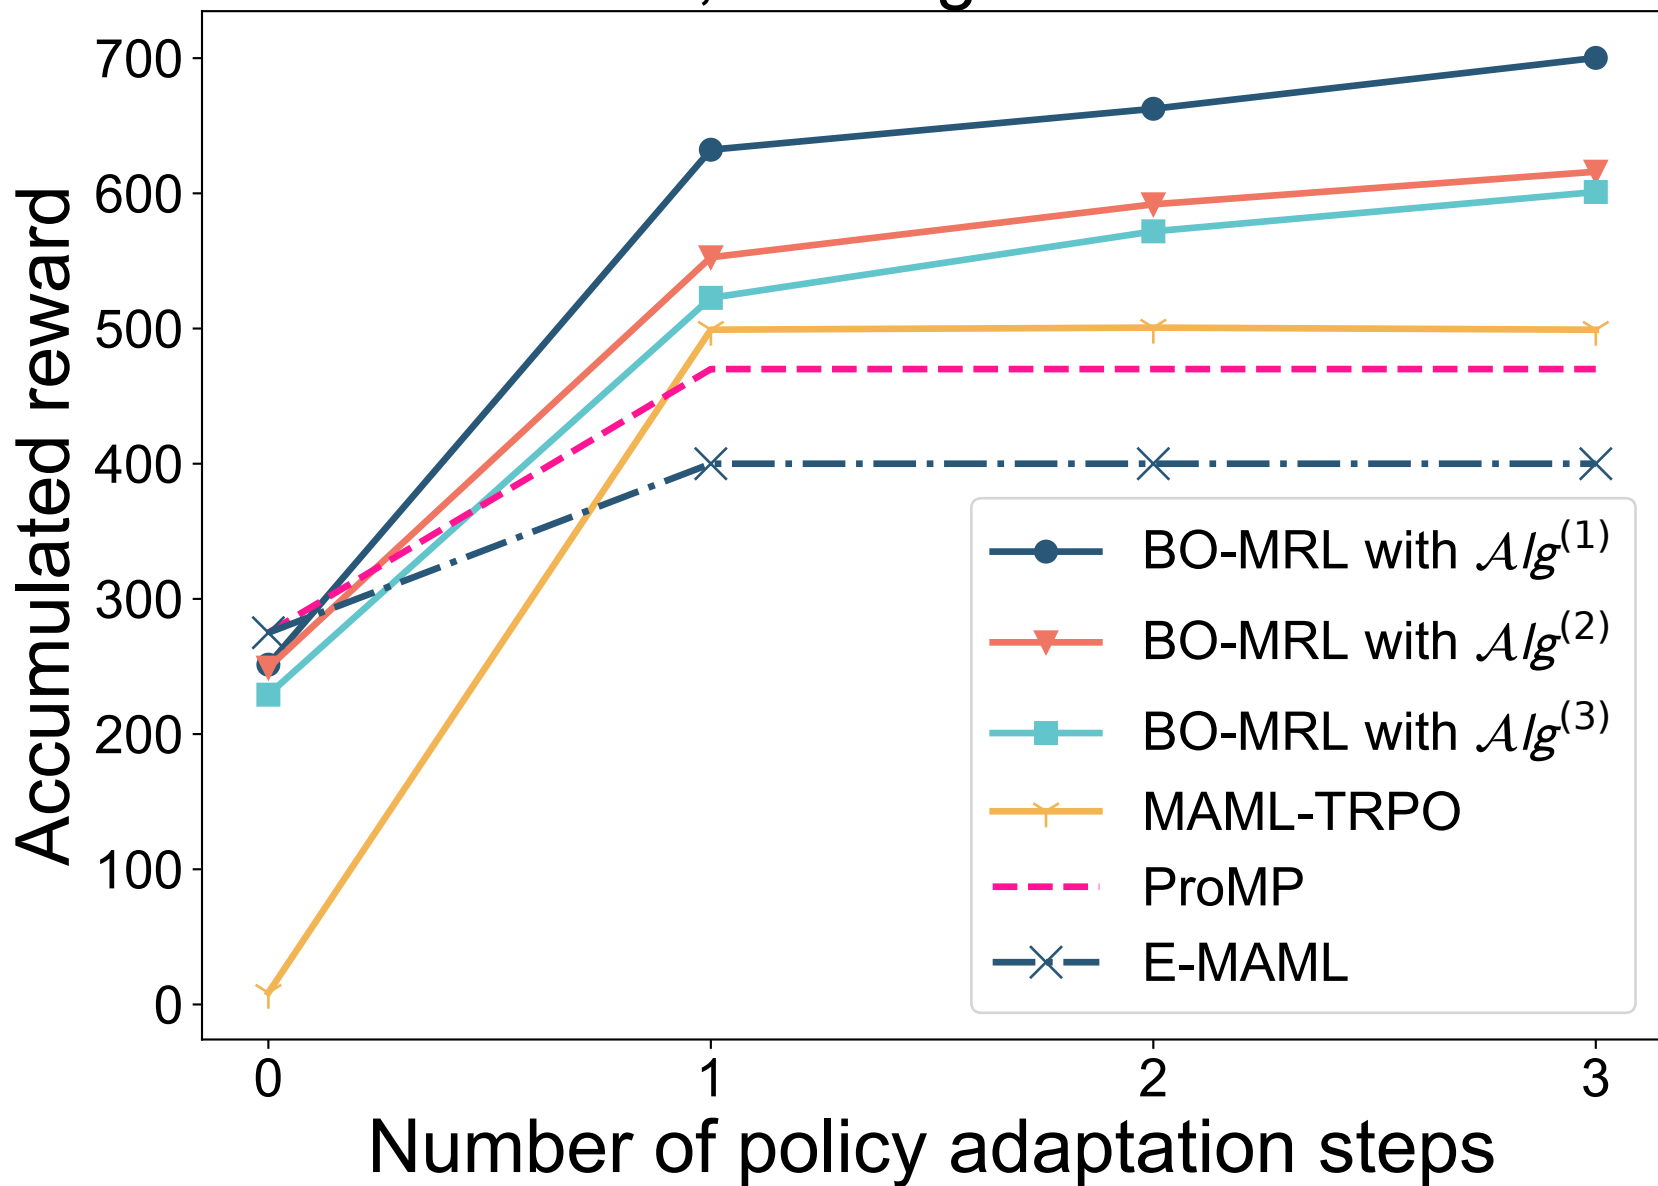

Supplement: supplementary_material [file attachment]

# Half-cheetah, goal velocity

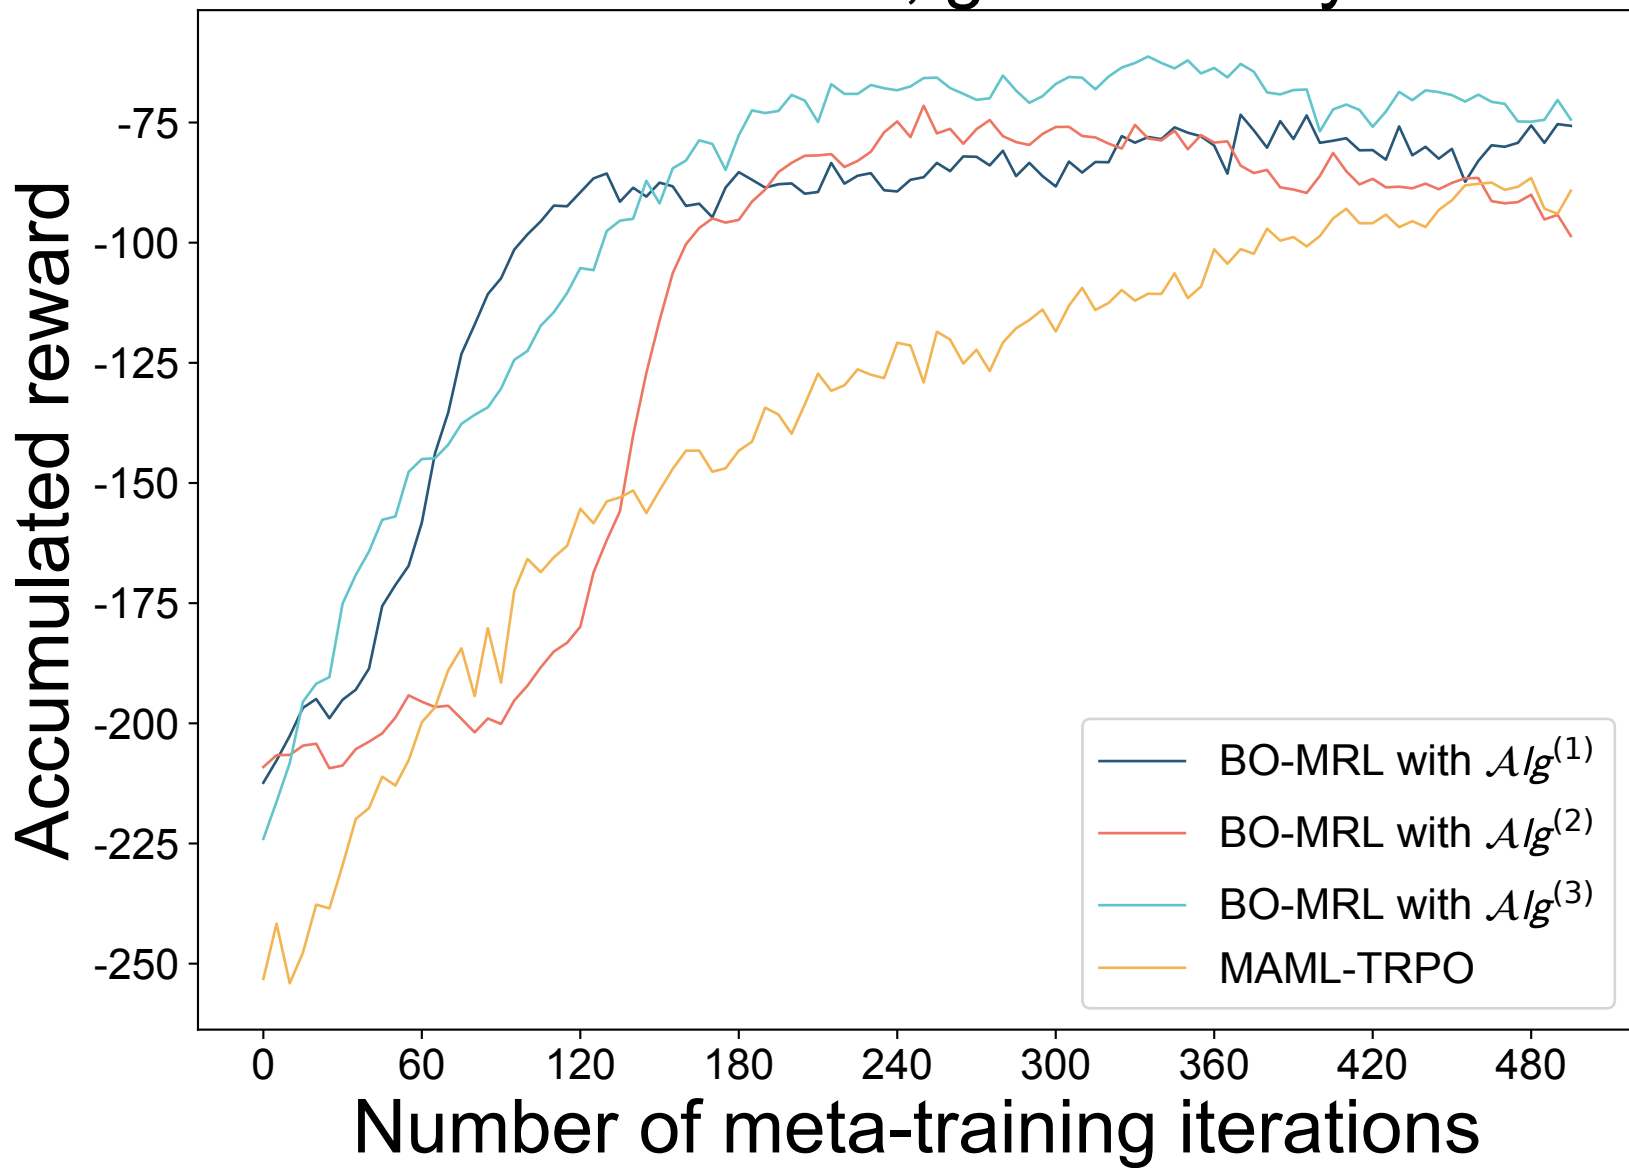

Supplement: supplementary_material [file attachment]
